# Supplementary material
Source: publisher site journal article supplement (https://www.dovepress.com/article/237938)

**Figure S1** Illustration of the fabrication of a traditional SPR chip (**A**), and GO-SPR chip (**B**).

**Abbreviations:** SPR, surface plasmon resonance; GO, graphene oxide; Au, gold; Cr, chromium; MOA, 8-mercaptopentanoic acid; -COOH, carboxyl group; Cys, cystamine; -NH<sub>2</sub>, amino group.

**Figure S2 (A)** Molecular structure of a GO sheet and its oxygen-containing functional groups.

**(B)** SEM image of GO sheet.

**Abbreviations:** GO, graphene oxide; SEM, scanning electron microscope.

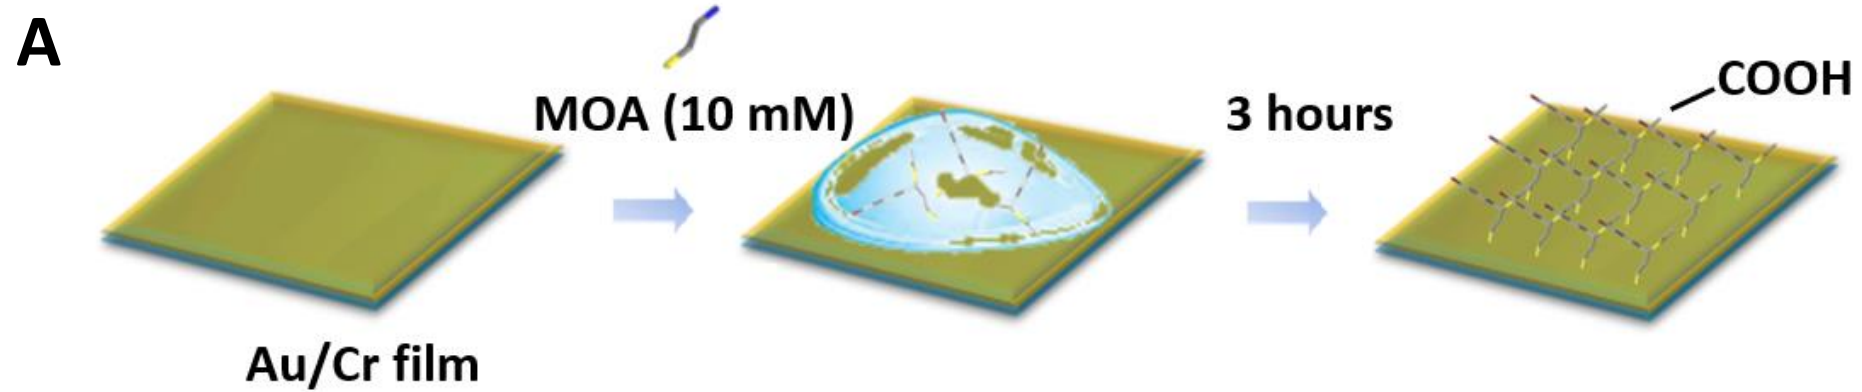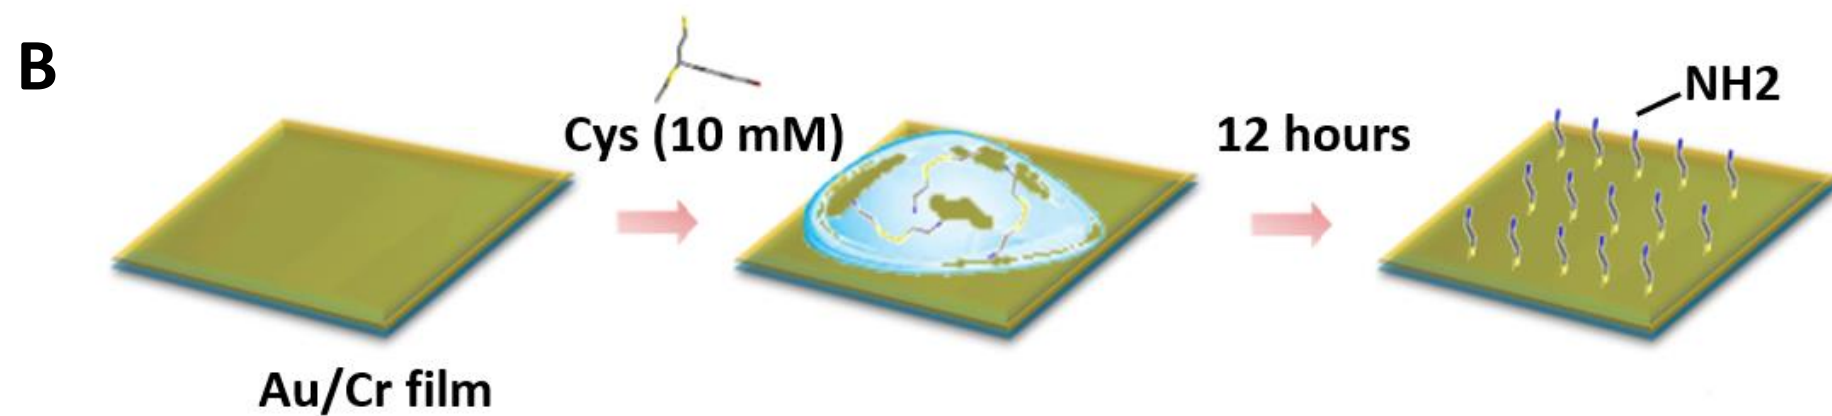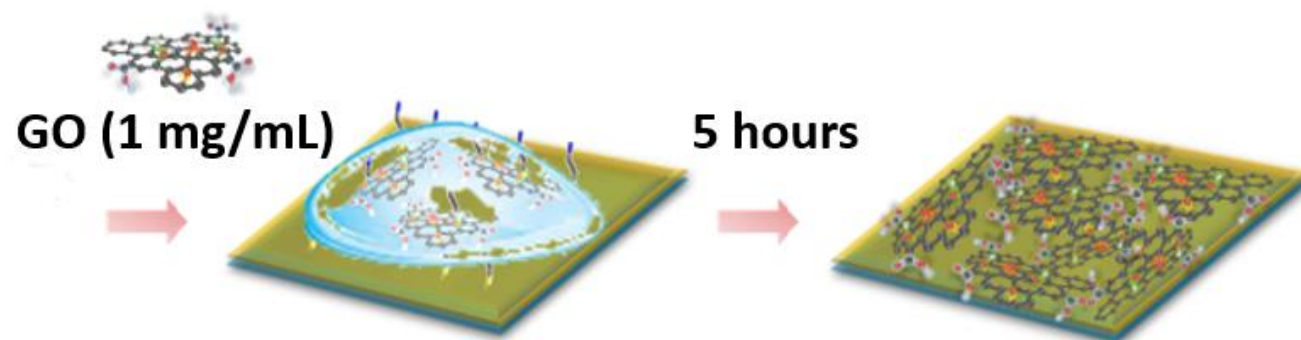

**A**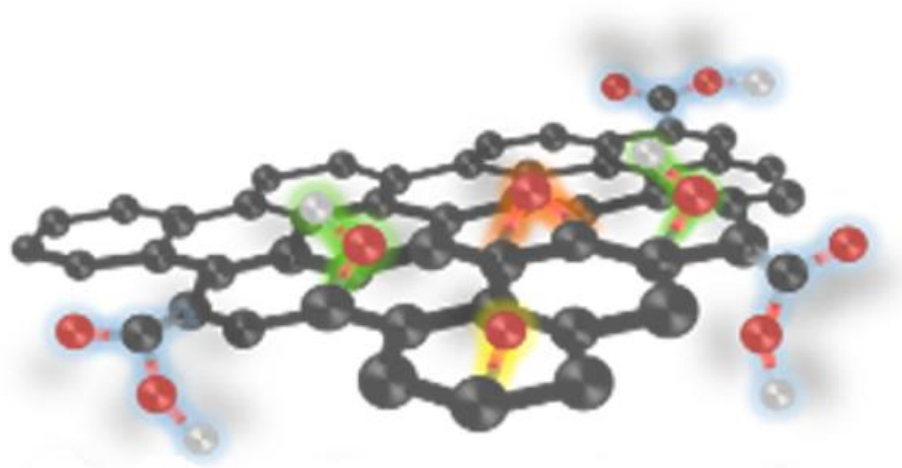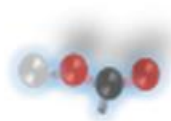

**Carboxyl**  
**(-COOH)**

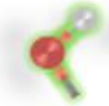

**Hydroxyl**  
**(-OH)**

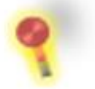

**Carbonyl**  
**(-C=O)**

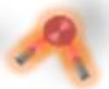

**Epoxy**  
**(-O)**

**B**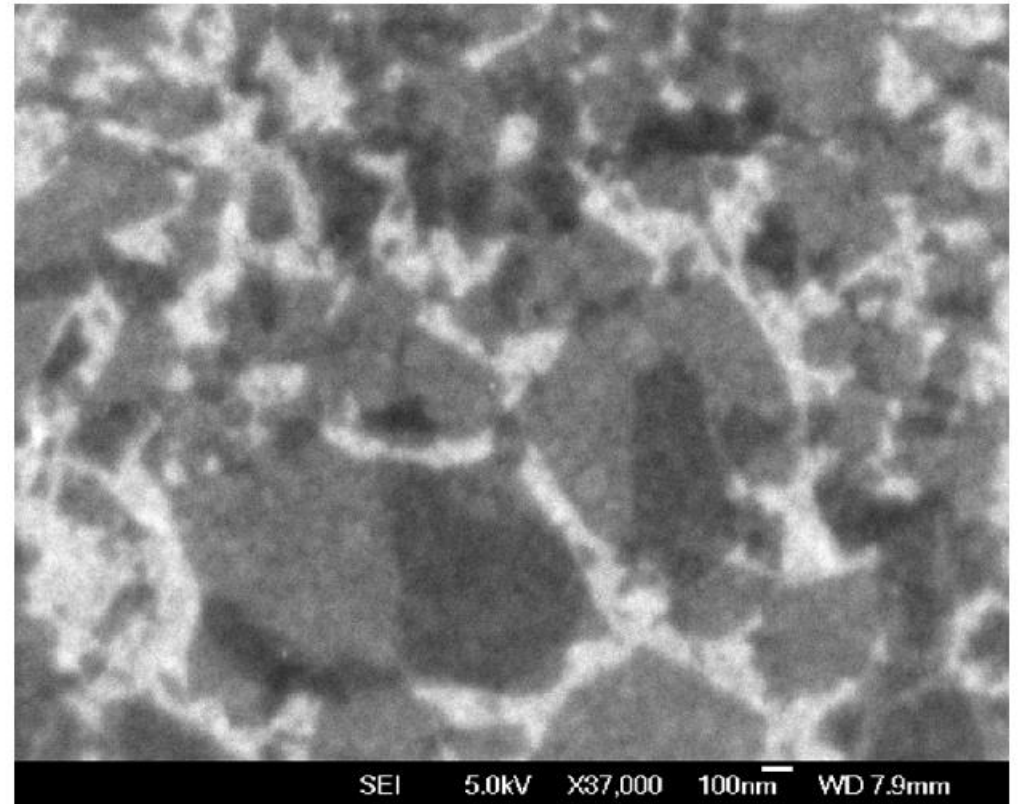

Supplement: Supplementary file 1 [file get_supplementary_file.php]
